# Supplementary material for: Computational Analysis of Mutations in the Receptor-Binding Domain of SARS-CoV-2 Spike and Their Effects on Antibody Binding
Source: MDPI journal article supplement (doi:10.3390/v14020295), 2022-01-30
Supplement: s1 [file s1]

# Computational Analysis of Mutations in the Receptor-Binding Domain of SARS-CoV-2 Spike and their Effects on Antibody Binding

Marine E. Bozdaganyan<sup>a,b,c</sup>, Konstantin V. Shaitan<sup>a,b</sup>, Mikhail P. Kirpichnikov<sup>a</sup>, Olga S. Sokolova<sup>a,c\*</sup>, and Philipp S. Orekhov<sup>a,c,d\*</sup>

<sup>a</sup> Faculty of Biology, M.V. Lomonosov Moscow State University, Moscow, Russia

<sup>b</sup> N.N. Semenov Federal Research Center for Chemical Physics, Russian Academy of Sciences, Moscow, Russia

<sup>c</sup> Shenzhen MSU-BIT University, Shenzhen, China

<sup>d</sup> Sechenov University, Moscow, Russia

\* corresponding authors, e-mail: sokolova@mail.bio.msu.ru; orekhov@mail.bio.msu.ru

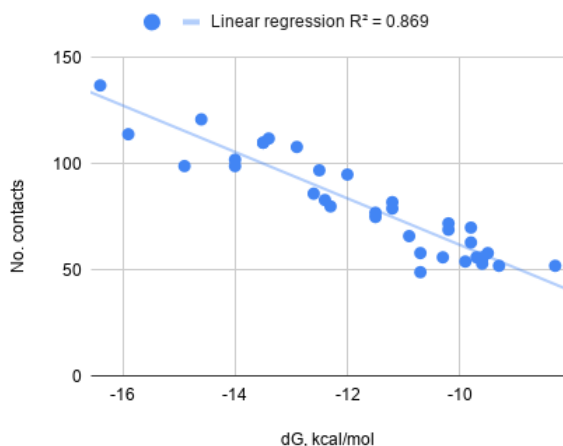

**Figure S1.** Theoretical estimation of the free energy of the Ab-RBD complexes plotted as a function of the contact count. The linear regression trend is shown.

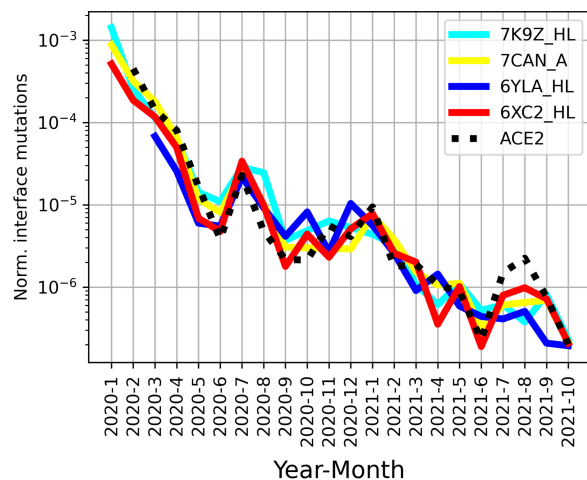

**Figure S2.** Number of novel unique mutations appeared at the RBD interfaces for 4 selected Abs (color lines) and ACE2 (dashed black line) normalized by the epitope size and the number of RBD sequences during the course of pandemics (from March 2020 to October 2021).

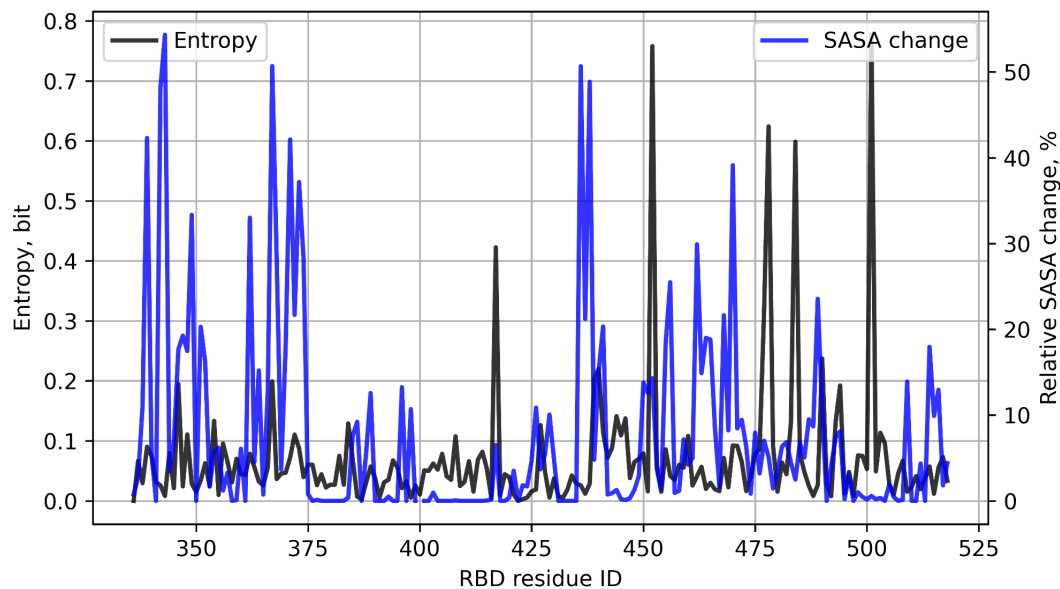

**Figure S3.** Shannon entropy calculated using the multiple sequence alignment (MSA) of RBD (black curve) and per-residue change of solvent accessible surface area (SASA) in the presence of glycans with respect to the unglycosylated S-protein (blue curve).

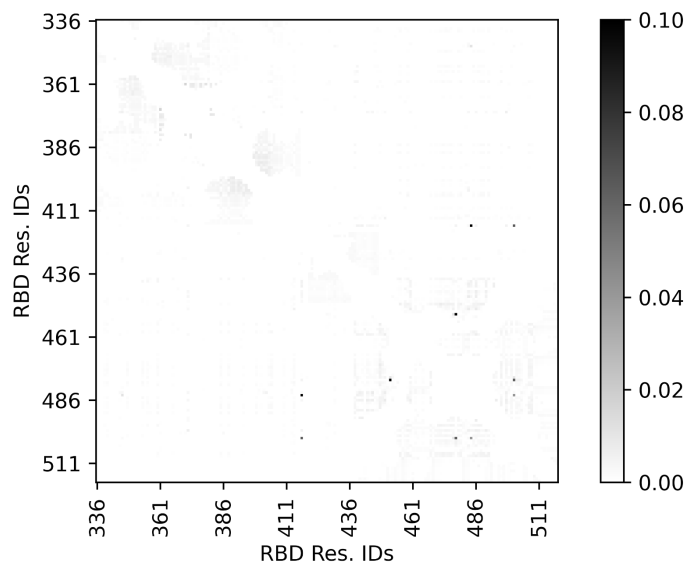

**Figure S4.** Mutual Information (MI) matrix estimated from the MSA of RBD indicating several spatially distant co-evolving positions. Mutations in variable positions can occur because they are either accompanied or preceded by compensatory changes in other variable positions. Such compensation would result in a coupling between changes in the two positions, or coevolution. The degree of such coupling can be estimated by means of mutual information (MI). Top 5

co-evolving pairs of positions are N501-E484, N501-T478, N501-K417, E484-K417, and T478-L452.

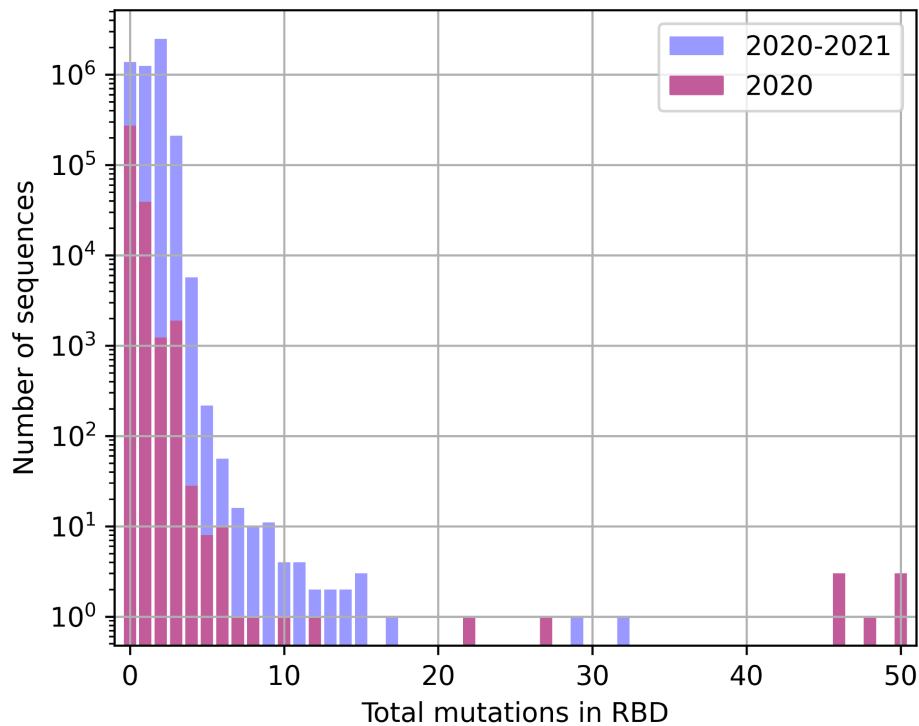

**Figure S5.** Number of RBD sequences stored in the GISAID database during 2020 and during 2020-2021 periods with the given mutation counts with respect to the original Wuhan variant. Number of multiple mutants increases significantly in 2021 compared to 2020.

**Table S1.** List of mutations, which lower the binding affinities between RBD and antibodies ( $\Delta\Delta G > 0.6$  kcal/mol) but do not lower the binding affinity to ACE2 ( $\Delta\Delta G \leq 0$  kcal/mol).

| Antibody | Variant | $\Delta\Delta G$ , kcal/mol<br>(RBD:Ab) | $\Delta\Delta G$ , kcal/mol<br>(RBD:ACE2) |
|----------|---------|-----------------------------------------|-------------------------------------------|
| 7K9Z_HL  | P337M   | 0.62                                    | -0.22                                     |
| 7K9Z_HL  | P337R   | 0.62                                    | -0.26                                     |
| 7K9Z_HL  | P337E   | 0.63                                    | -0.16                                     |
| 7K9Z_HL  | P337Q   | 0.63                                    | -0.19                                     |
| 7K9Z_HL  | P337G   | 0.64                                    | -0.06                                     |
| 7K9Z_HL  | V483C   | 0.66                                    | -0.01                                     |
| 7K9Z_HL  | P337Y   | 0.76                                    | -0.26                                     |
| 7K9Z_HL  | P337F   | 0.77                                    | -0.24                                     |
| 7K9Z_HL  | P337W   | 0.81                                    | -0.15                                     |
| 7K9Z_HL  | I468F   | 0.81                                    | 0                                         |
| 7K9Z_HL  | I468H   | 0.88                                    | -0.02                                     |
| 7K9Z_HL  | G482C   | 0.89                                    | 0                                         |

|         |       |      |       |
|---------|-------|------|-------|
| 7K9Z_HL | V483G | 1.02 | -0.34 |
| 7K9Z_HL | I468T | 1.77 | -0.08 |
| 7K9Z_HL | I468N | 1.83 | -0.01 |
| 7CAN_A  | E484S | 0.61 | 0     |
| 7CAN_A  | S383P | 0.65 | -0.05 |
| 7CAN_A  | P337W | 0.67 | -0.15 |
| 7CAN_A  | V483G | 0.82 | -0.34 |
| 7CAN_A  | E484A | 0.83 | -0.01 |
| 6YLA_HL | V362A | 0.64 | 0     |
| 6YLA_HL | D428T | 0.66 | -0.04 |
| 6YLA_HL | P337K | 0.68 | -0.18 |
| 6YLA_HL | P337E | 0.7  | -0.16 |
| 6YLA_HL | P337G | 0.72 | -0.06 |
| 6YLA_HL | Y369L | 0.72 | -0.1  |
| 6YLA_HL | K378T | 0.76 | -0.19 |
| 6YLA_HL | T385N | 0.85 | -0.13 |
| 6YLA_HL | K378Q | 0.88 | 0     |
| 6YLA_HL | K378C | 0.93 | -0.12 |
| 6YLA_HL | D428A | 0.95 | 0     |
| 6YLA_HL | K378S | 1.21 | -0.07 |
| 6YLA_HL | T385E | 1.23 | -0.09 |
| 6YLA_HL | K378N | 1.24 | -0.05 |
| 6YLA_HL | T385D | 1.24 | -0.17 |
| 6YLA_HL | T385Q | 1.24 | -0.02 |
| 6YLA_HL | G381A | 1.25 | -0.04 |
| 6YLA_HL | G381S | 1.26 | -0.07 |
| 6YLA_HL | Y369I | 1.33 | -0.02 |
| 6YLA_HL | S383P | 1.35 | -0.05 |
| 6YLA_HL | T385S | 1.36 | -0.09 |
| 6YLA_HL | T385P | 1.5  | -0.05 |
| 6XC2_HL | N481P | 0.64 | -0.11 |
| 6XC2_HL | R403L | 0.66 | -0.04 |
| 6XC2_HL | P337K | 0.67 | -0.18 |
| 6XC2_HL | R403I | 0.67 | -0.01 |
| 6XC2_HL | P337E | 0.68 | -0.16 |
| 6XC2_HL | N422P | 0.68 | -0.18 |
| 6XC2_HL | T415R | 0.75 | -0.03 |

|         |       |      |       |
|---------|-------|------|-------|
| 6XC2_HL | P337G | 0.84 | -0.06 |
| 6XC2_HL | T415C | 1.01 | -0.02 |
| 6XC2_HL | G502R | 1.07 | -0.01 |
| 6XC2_HL | R403P | 1.36 | -0.05 |
